# Supplementary material for: Chitosan–sEPDM and Melatonin–Chitosan–sEPDM Composite Membranes for Melatonin Transport and Release
Source: MDPI journal article supplement (doi:10.3390/membranes13030282), 2023-02-27
Supplement: s1 [file s1]

# Chitosan–sEPDM and Melatonin–Chitosan–sEPDM composite membranes for melatonin transport and release

Florentina Mihaela Păncescu <sup>1</sup>, Abbas Abdul Kadhim Klaif Rikabi <sup>1,2</sup>, Ovidiu Cristian Oprea <sup>3</sup>, Alexandra Raluca Grosu <sup>1</sup>, Aurelia Cristina Nechifor <sup>1</sup>, Vlad-Alexandru Grosu <sup>4,\*</sup>, Szidonia-Katalin Tanczos <sup>5</sup>, Florina Dumitru <sup>3</sup>, Gheorghe Nechifor <sup>1,\*</sup> and Simona Gabriela Bungău <sup>6</sup>

- <sup>1</sup> Analytical Chemistry and Environmental Engineering Department, University Politehnica of Bucharest, Bucharest 011061, Romania; florynicorici@yahoo.com (F.M.P.); dr.abbas.rikabi@atu.edu.iq (A.A.K.K.R.); andra.grosu@upb.ro (A.R.G.); aureliacristinanechifor@gmail.com (A.C.N.); ghnechifor@gmail.com (G.N.)
  - <sup>2</sup> Al-Mussaib Technical College/Al-Furat Al-Awsat Technical University (ATU), Babylon - Najaf Street, Kufa 54003, Iraq; dr.abbas.rikabi@atu.edu.iq; (A.A.K.K.R.)
  - <sup>3</sup> Department of Inorganic Chemistry, Physical Chemistry and Electrochemistry, University Politehnica of Bucharest, Bucharest 011061, Romania; ovidiu.oprea@upb.ro (O.C.O.); d\_florina@yahoo.com (F.D.)
  - <sup>4</sup> Department of Electronic Technology and Reliability, Faculty of Electronics, Telecommunications and Information Technology, University Politehnica of Bucharest, Bucharest 061071, Romania; vlad.grosu@upb.ro (V.-A.G)
  - <sup>5</sup> Department of Bioengineering, University Sapientia of Miercurea-Ciuc, Miercurea-Ciuc 500104, Romania; tczsidonia@yahoo.com (S.-K.T.)
  - <sup>6</sup> Department of Pharmacy, Faculty of Medicine and Pharmacy, University of Oradea, Oradea 410028, Romania; sbungau@uoradea.ro (S.G.B.)
- \* Corresponding authors: vlad.grosu@upb.ro (V.-A.G); ghnechifor@gmail.com (G.N.)

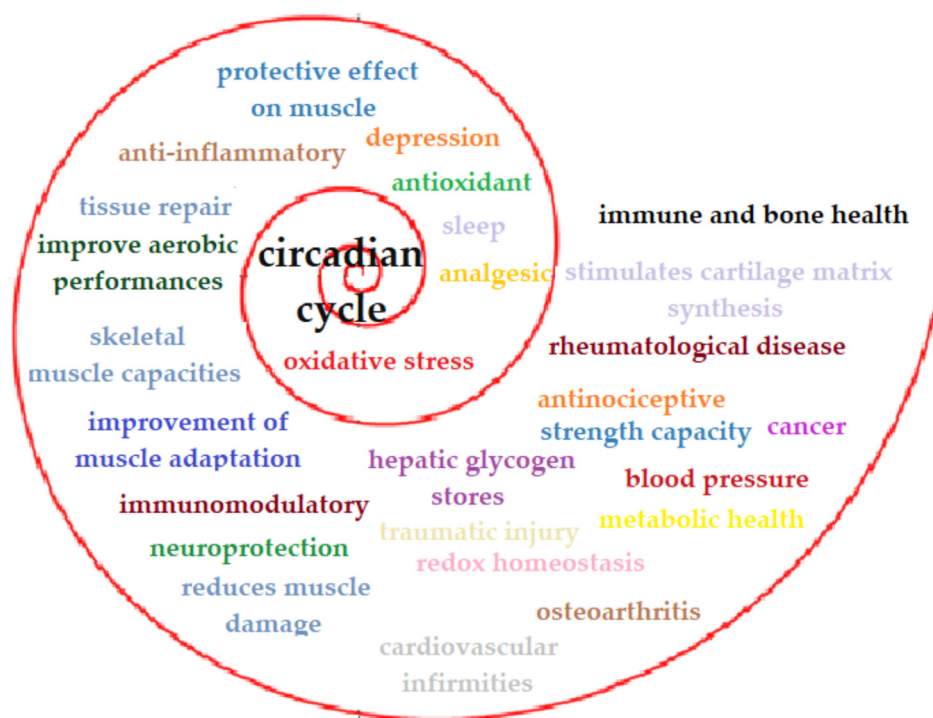

**Figure S1.** Schematic presentation of the melatonin biomedical implication.

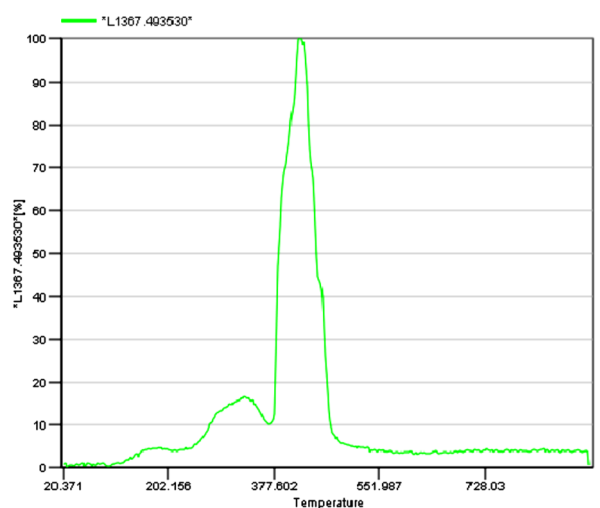

(a)

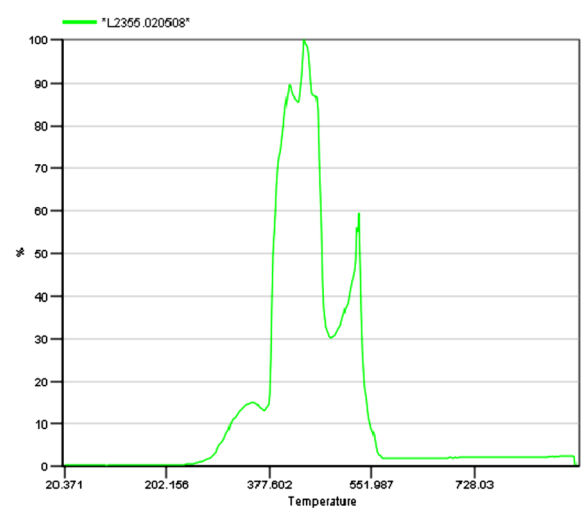

(b)

Figure S2. Trace for evolving SO<sub>2</sub> (1367 cm<sup>-1</sup>) vs temperature (a); and trace for evolving CO<sub>2</sub> (2355 cm<sup>-1</sup>) vs temperature (b).

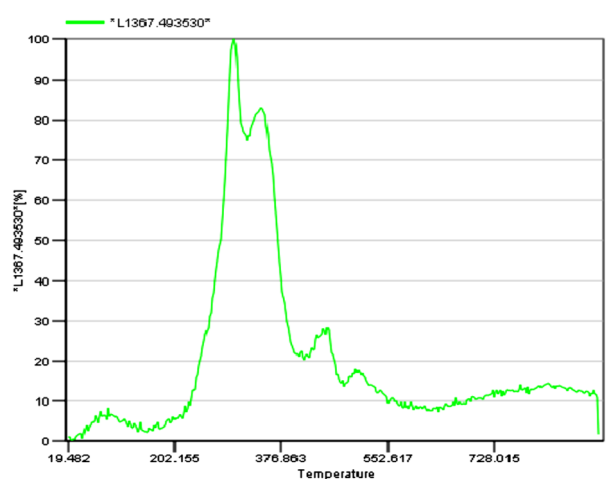

(a)

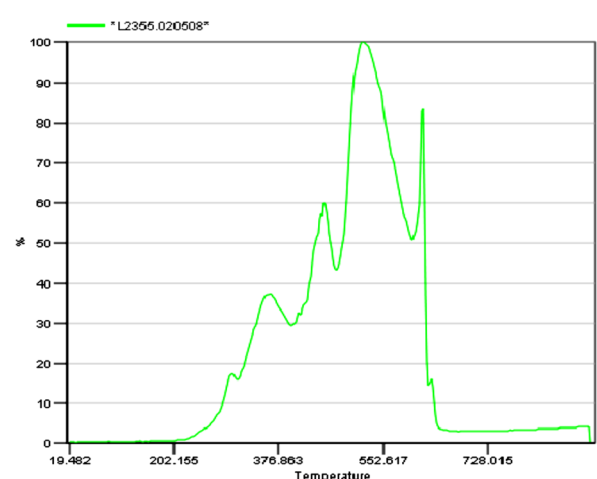

(b)

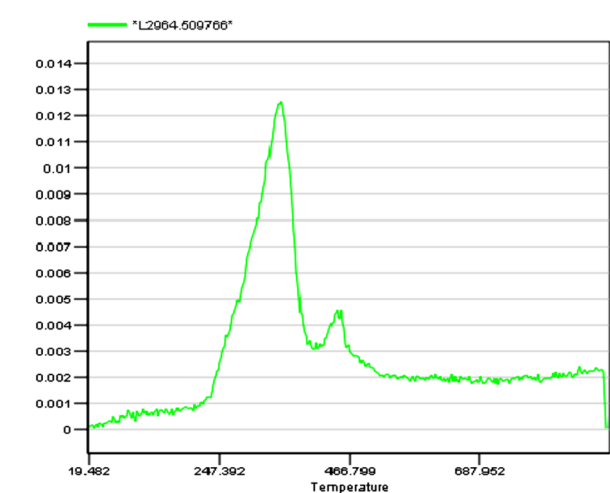

(c)

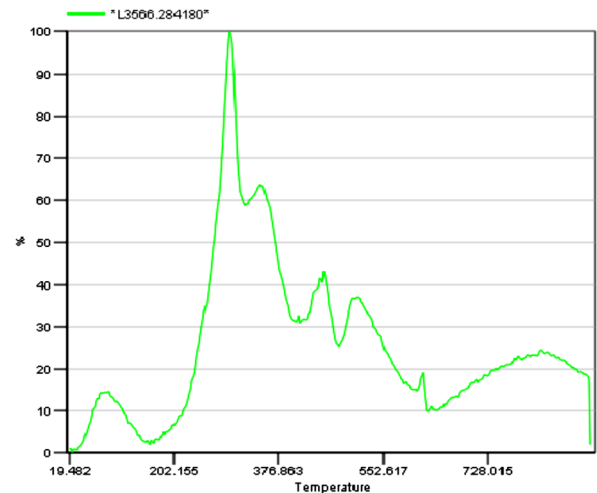

(d)

Figure S3. Trace for evolving (a) SO<sub>2</sub> (1367 cm<sup>-1</sup>); (b) CO<sub>2</sub> (2355 cm<sup>-1</sup>); (c) hydrocarbons (2964 cm<sup>-1</sup>); and (d) H<sub>2</sub>O (3566 cm<sup>-1</sup>) vs temperature.

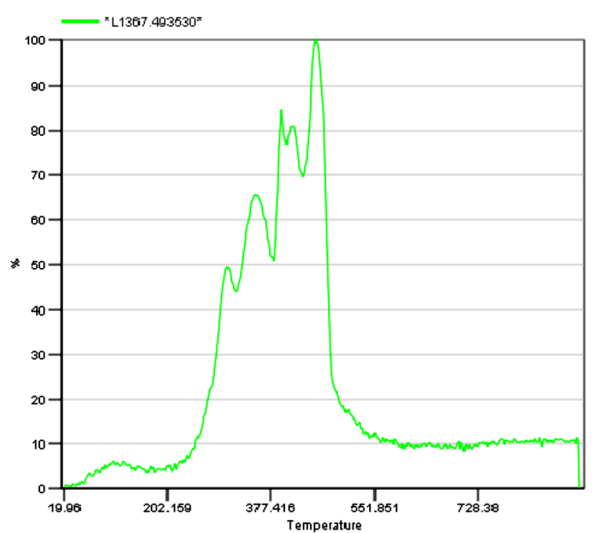

(a)

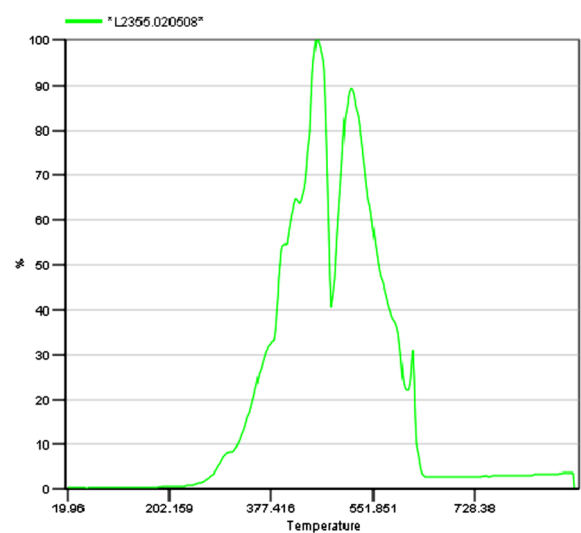

(b)

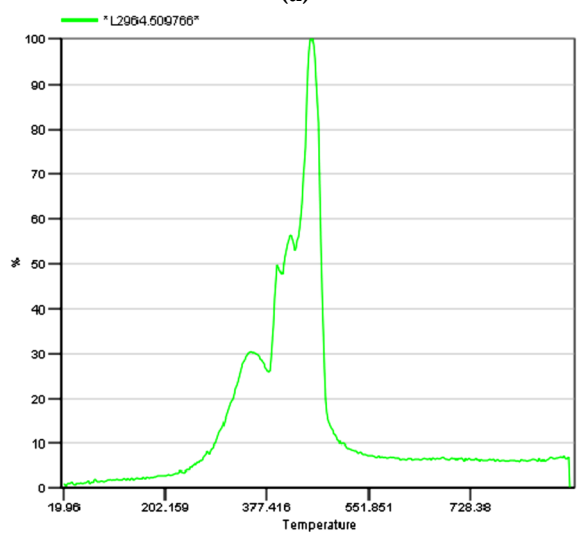

(c)

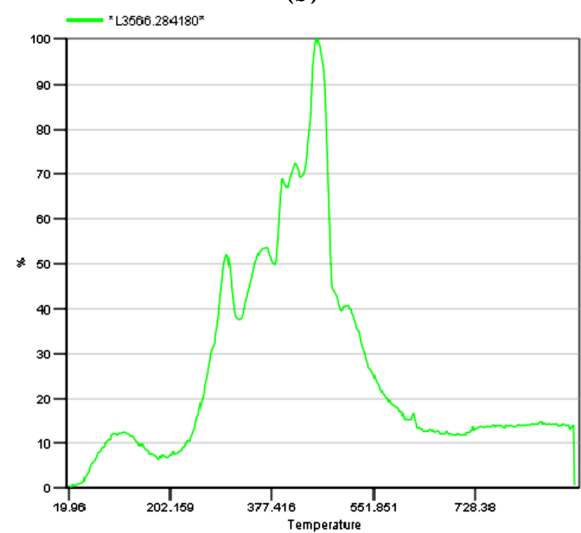

(d)

Figure S4. Trace for evolving (a) SO<sub>2</sub> (1367 cm<sup>-1</sup>); (b) CO<sub>2</sub> (2355 cm<sup>-1</sup>); (c) hydrocarbons (2964 cm<sup>-1</sup>); and (d) H<sub>2</sub>O (3566 cm<sup>-1</sup>) vs temperature.
